# Supplementary material for: Temporal Trends in Practice Patterns After Introduction of Pediatric Hypertension Guidelines in Canada
Source: PubMed Central journal article supplement (PMC10853834; doi:10.1001/jamanetworkopen.2023.55239), 2024-02-08

## Supplemental Online Content

Wu M, Dart A, Kosowan L, et al. Temporal trends in practice patterns after introduction of pediatric hypertension guidelines in Canada. *JAMA Netw Open*. 2024;7(2):e2355239. doi:10.1001/jamanetworkopen.2023.55239

**eTable 1.** Classification of Office-Based BP in Children and Adolescents by the Fourth Report 2005, American Academy of Pediatrics 2017, and Hypertension Canada 2020 Guidelines

**eTable 2.** Study Population Demographics Split Based on Individual Years

**eFigure 1.** Preguideline Flow Diagram

**eFigure 2.** Postguideline Flow Diagram

**eFigure 3.** The Proportion of Children Who Receive an Annual Blood Pressure Screening From January 1, 2011 to December 31, 2019 by a Primary Care Provider

**eTable 3.** Results of Interrupted Time-Series Analysis to Show the Impact of Hypertension Guidelines on BP Screening, Abnormal BP Follow-Up, HTN Prevalence and Laboratory and Medication Prescriptions, January 1, 2014-December 31, 2019

**eTable 4.** Results of Stratified Interrupted Time-Series Analysis to Show the Impact of Hypertension Guidelines on BP Screening by Children's BMI and Age

**eFigure 4.** Pediatric Patients With Blood Pressure Screening Documentation in the EMR of Primary Care Providers Participating in CPCSSN Between January 1, 2011, and December 31, 2019, by BMI

**eFigure 5.** Pediatric Patients With Blood Pressure Screening Documentation in the EMR of Primary Care Providers Participating in CPCSSN Between January 1, 2011, and December 31, 2019, by Age

**eFigure 6.** Pediatric Patients That Had a BP Documented With A Follow-Up Blood Pressure Screening Documented in the EMR of Primary Care Providers Participating in CPCSSN Between January 1, 2011, and December 31, 2019

**eFigure 7.** The Proportion of Children With a BP Screening Who Met HTN Criteria From January 1, 2011 to December 31, 2019 by a Primary Care Provider

**eTable 5.** Results of Stratified Interrupted Time-Series Analysis to Show the Impact of Hypertension Guidelines on HTN Prevalence by Patient BMI and Age

**eFigure 8.** Pediatric Patients That Had a BP Screen With  $\geq 2$  Elevated Blood Pressures Documented in the EMR of Primary Care Providers Participating in CPCSSN Between January 1, 2011, and December 31, 2019, by BMI

**eFigure 9.** Pediatric Patients With  $\geq 2$  Elevated Blood Pressures Documented in the EMR of Primary Care Providers Participating in CPCSSN Between January 1, 2011, and December 31, 2019, by Age

**eFigure 10.** The Proportion of Children Who Underwent Laboratory Testing or Had a Medication Follow-Up From January 1, 2011 to December 31, 2019 by a Primary Care Provider

This supplemental material has been provided by the authors to give readers additional information about their work.

**eTable 1.** Classification of Office-Based BP in Children and Adolescents by the Fourth Report 2005, American Academy of Pediatrics 2017, and Hypertension Canada 2020 Guidelines

| <b>Guidelines</b>                        | <b>Fourth Report (2005)</b>                                                                                                                                                                                                                                                                                                                                                                                                                                                                                                                  | <b>American Academy of Pediatrics (2017)</b>                                                                                                                                                                                                                                                                                                                                                                          | <b>Hypertension Canada (2016)</b>                                                                                                                                                                                                                                                                                                                                                                                       |
|------------------------------------------|----------------------------------------------------------------------------------------------------------------------------------------------------------------------------------------------------------------------------------------------------------------------------------------------------------------------------------------------------------------------------------------------------------------------------------------------------------------------------------------------------------------------------------------------|-----------------------------------------------------------------------------------------------------------------------------------------------------------------------------------------------------------------------------------------------------------------------------------------------------------------------------------------------------------------------------------------------------------------------|-------------------------------------------------------------------------------------------------------------------------------------------------------------------------------------------------------------------------------------------------------------------------------------------------------------------------------------------------------------------------------------------------------------------------|
| BP screening and measurement             | <ul style="list-style-type: none"> <li>- Children 3 years and greater should have their BP measured whenever seen in a medical setting</li> <li>-Children under age 3 should have BP measured when they have conditions such as known renal disease</li> <li>- The preferred method of BP measurement is auscultatory approach, while measurements obtained by oscillometric approach that exceed the 90th percentile should be repeated by auscultation.</li> <li>-ABPM only should be used by experts in field of pediatric HTN</li> </ul> | <ul style="list-style-type: none"> <li>- Annual BP measurement in children 3 years of age and greater</li> <li>-BP measurement at every visit if child has risk factors for HTN</li> <li>- Oscillometric approach can be used for screening, but the results must be confirmed by auscultatory approach</li> <li>- Elevated BP should be confirmed on 3 separate clinic visits</li> <li>- ABPM recommended</li> </ul> | <ul style="list-style-type: none"> <li>-BP should be regularly measured in children 3 years of age and older</li> <li>-There is no recommendation on screening frequency</li> <li>- Oscillometric approach can be used for screening, but the results must be confirmed by auscultatory approach</li> <li>- Elevated BP should be confirmed on 3 separate clinic visits</li> <li>- ABPM should be considered</li> </ul> |
| Hypertension threshold                   | Blood pressure >95th percentile                                                                                                                                                                                                                                                                                                                                                                                                                                                                                                              | <ul style="list-style-type: none"> <li>≥95th percentile (&lt;13 yr)</li> <li>Or ≥130/80 (≥13 yr)</li> </ul>                                                                                                                                                                                                                                                                                                           | <ul style="list-style-type: none"> <li>If either systolic or diastolic blood pressure is ≥95th</li> <li>Can be staged.</li> <li>Stage 1 is 95th-99th percentile plus 5 mm Hg.</li> <li>Stage 2 is BP &gt;99th percentile plus 5 mm Hg</li> </ul>                                                                                                                                                                        |
| Target BP (general pediatric population) | <90th percentile                                                                                                                                                                                                                                                                                                                                                                                                                                                                                                                             | <ul style="list-style-type: none"> <li>&lt;90th percentile (&lt;13 yr)</li> <li>Or &lt;130/80 (≥13 yr)</li> </ul>                                                                                                                                                                                                                                                                                                     | Not mentioned                                                                                                                                                                                                                                                                                                                                                                                                           |

**eTable 2. Study Population Demographics Split Based on Individual Years**

|                                                           | Total<br>N=<br>343,191 | 2011<br>N=<br>90,684 | 2012<br>N=<br>105,909 | 2013<br>N=<br>115,647 | 2014<br>N=<br>128,009 | 2015<br>N=<br>134,355 | 2016<br>N=<br>141,657 | 2017<br>N=<br>147,653 | 2018<br>N=<br>148,445 | 2019<br>N=<br>141,058 | 2020<br>N=<br>108,148 |
|-----------------------------------------------------------|------------------------|----------------------|-----------------------|-----------------------|-----------------------|-----------------------|-----------------------|-----------------------|-----------------------|-----------------------|-----------------------|
| Age<br>(mean,<br>SD)                                      |                        | 8.0<br>(6.0)         | 8.1 (6.0)             | 8.1<br>(6.0)          | 8.1<br>(6.0)          | 8.1<br>(6.0)          | 8.2<br>(5.9)          | 8.3<br>(5.9)          | 9.0 (5.6)             | 9.7<br>(5.3)          | 10.4<br>(4.9)         |
| Age of<br>first<br>clinical<br>encounter<br>(mean,<br>SD) | 6.7 (4.6)              | 8.6<br>(5.3)         | 8.0 (5.1)             | 7.3<br>(4.7)          | 6.7<br>(4.3)          | 6.2<br>(3.9)          | 5.7<br>(3.5)          | 5.2<br>(3.1)          | 5.0 (2.8)             | 4.7<br>(2.4)          | 4.4<br>(2.1)          |
| Age<br>First BP<br>(mean,<br>SD)                          | 11.6<br>(5.1)          | 11.5<br>(5.0)        | 11.3<br>(5.1)         | 10.9<br>(5.1)         | 10.6<br>(5.1)         | 10.4<br>(5.0)         | 10.2<br>(5.0)         | 10.0<br>(4.9)         | 10.0<br>(4.8)         | 9.8<br>(4.7)          | 9.5<br>(4.6)          |
| Female<br>n(%)                                            | 173,290<br>(50.5)      | 46,401<br>(51.2)     | 53,955<br>(50.9)      | 58,788<br>(50.8)      | 64,747<br>(50.6)      | 68,195<br>(50.8)      | 71,861<br>(50.7)      | 74,996<br>(50.8)      | 75,285<br>(50.7)      | 71,993<br>(51.0)      | 55,803<br>(51.6)      |
| Urban<br>n(%)                                             | 275,549<br>(82.8)      | 74,312<br>(84.0)     | 86,574<br>(81.7)      | 94,873<br>(83.9)      | 104,297<br>(83.3)     | 109,237<br>(83.2)     | 115,378<br>(83.3)     | 120,354<br>(83.3)     | 120,179<br>(82.6)     | 114,333<br>(82.7)     | 18,344<br>(17.3)      |
| Obesity<br>n(%)                                           | 62,583<br>(29.4)       | 19,598<br>(33.8)     | 23,877<br>(33.5)      | 27,449<br>(33.2)      | 30,545<br>(32.6)      | 31,935<br>(31.8)      | 33,180<br>(31.2)      | 33,713<br>(30.7)      | 34,043<br>(30.4)      | 32,815<br>(30.3)      | 25,490<br>(30.8)      |

|                                                                          |                  |                  |                  |                  |                  |                  |                  |                  |                  |                  |                  |
|--------------------------------------------------------------------------|------------------|------------------|------------------|------------------|------------------|------------------|------------------|------------------|------------------|------------------|------------------|
| Hyperlipidemia<br>n(%)                                                   | 2,782<br>(0.8)   | 1,140<br>(1.3)   | 1,279<br>(1.2)   | 1,408<br>(1.2)   | 1,451<br>(1.1)   | 1,517<br>(1.1)   | 1,453<br>(1.0)   | 1,470<br>(1.0)   | 1,410<br>(1.0)   | 1,275<br>(0.9)   | 963<br>(0.9)     |
| Diabetes<br>n(%)                                                         | 1,514<br>(0.4)   | 593<br>(0.7)     | 619<br>(0.6)     | 684<br>(0.6)     | 742<br>(0.6)     | 767<br>(0.6)     | 782<br>(0.6)     | 793<br>(0.5)     | 769<br>(0.5)     | 679<br>(0.5)     | 655<br>(0.5)     |
| Social and material deprivation index*(missing for 8% of the population) |                  |                  |                  |                  |                  |                  |                  |                  |                  |                  |                  |
| Q1 n(%)                                                                  | 63,112<br>(19.9) | 19,736<br>(23.0) | 21,478<br>(21.5) | 23,040<br>(21.1) | 25,105<br>(20.9) | 26,332<br>(21.0) | 27,182<br>(20.6) | 27,775<br>(20.1) | 26,912<br>(19.5) | 25,687<br>(19.7) | 19,833<br>(19.7) |
| Q2 n(%)                                                                  | 72,818<br>(23.0) | 19,835<br>(23.1) | 24,094<br>(24.1) | 26,510<br>(24.3) | 29,335<br>(24.4) | 30,519<br>(24.3) | 31,836<br>(24.1) | 32,638<br>(23.7) | 31,627<br>(23.0) | 29,522<br>(22.6) | 22,292<br>(22.6) |
| Q3 n(%)                                                                  | 69,095<br>(21.8) | 16,901<br>(19.7) | 19,591<br>(19.6) | 21,771<br>(20.0) | 24,178<br>(20.1) | 25,399<br>(20.2) | 26,905<br>(20.4) | 28,577<br>(20.8) | 30,590<br>(22.2) | 29,196<br>(22.4) | 22,528<br>(22.4) |
| Q4 n(%)                                                                  | 57,768<br>(18.2) | 15,377<br>(17.9) | 18,587<br>(18.6) | 19,812<br>(18.2) | 21,213<br>(17.7) | 22,406<br>(17.8) | 23,940<br>(18.1) | 25,242<br>(18.3) | 25,668<br>(18.6) | 24,389<br>(18.7) | 18,398<br>(18.7) |
| Q5 n(%)                                                                  | 53,881<br>(17.0) | 13,937<br>(16.3) | 16,292<br>(16.3) | 17,904<br>(16.4) | 20,235<br>(16.9) | 20,947<br>(16.7) | 22,349<br>(16.9) | 23,505<br>(17.1) | 22,912<br>(16.6) | 21,639<br>(16.6) | 16,442<br>(16.6) |

|                                                               |                   |                  |                  |                  |                  |                  |                  |                  |                  |                  |                  |
|---------------------------------------------------------------|-------------------|------------------|------------------|------------------|------------------|------------------|------------------|------------------|------------------|------------------|------------------|
| BP Documentation n(%)                                         | 125,217<br>(36.5) | 12,569<br>(13.9) | 16,292<br>(15.4) | 18,640<br>(16.1) | 20,058<br>(15.7) | 22,648<br>(16.9) | 25,388<br>(17.9) | 28,090<br>(19.0) | 26,911<br>(18.1) | 28,923<br>(20.5) | 14,097<br>(13.0) |
| BP Hypertension (2 abnormal BP)[L1]                           | 5,931<br>(1.7)    | 187<br>(0.2)     | 412<br>(0.3)     | 530<br>(0.4)     | 647<br>(0.5)     | 764<br>(0.6)     | 960<br>(0.6)     | 1028<br>(0.6)    | 1547<br>(1.0)    | 2342<br>(1.7)    | 1137<br>(1.1)    |
| BP classification:<br><br>Hypertension (1 BP)                 | 16,127<br>(4.7)   | 1,447<br>(1.6)   | 1,575<br>(1.5)   | 1834<br>(1.6)    | 2025<br>(1.6)    | 2,360<br>(1.8)   | 2,812<br>(2.0)   | 2,938<br>(2.0)   | 4669<br>(3.1)    | 5161<br>(3.7)    | 2665<br>(2.5)    |
| BP classification:<br><br>Prehypertension /elevated BP (1 BP) | 13,881<br>(4.0)   | 1,201<br>(1.3)   | 1552<br>(1.5)    | 1736<br>(1.5)    | 1914<br>(1.5)    | 1992<br>(1.5)    | 2,292<br>(1.6)   | 2,521<br>(1.7)   | 3689<br>(2.5)    | 4259<br>(3.0)    | 1979<br>(1.8)    |
| BP classification:<br><br>Normal BP                           | 95,209<br>(27.7)  | 9,921<br>(10.9)  | 13,165<br>(12.4) | 15,070<br>(13.0) | 16119<br>(12.6)  | 18,296<br>(13.6) | 20,284<br>(1.4)  | 22,631<br>(15.3) | 18,553<br>(12.5) | 19,503<br>(13.8) | 9453<br>(8.7)    |

**eFigure 1.** Preguideline Flow Diagram

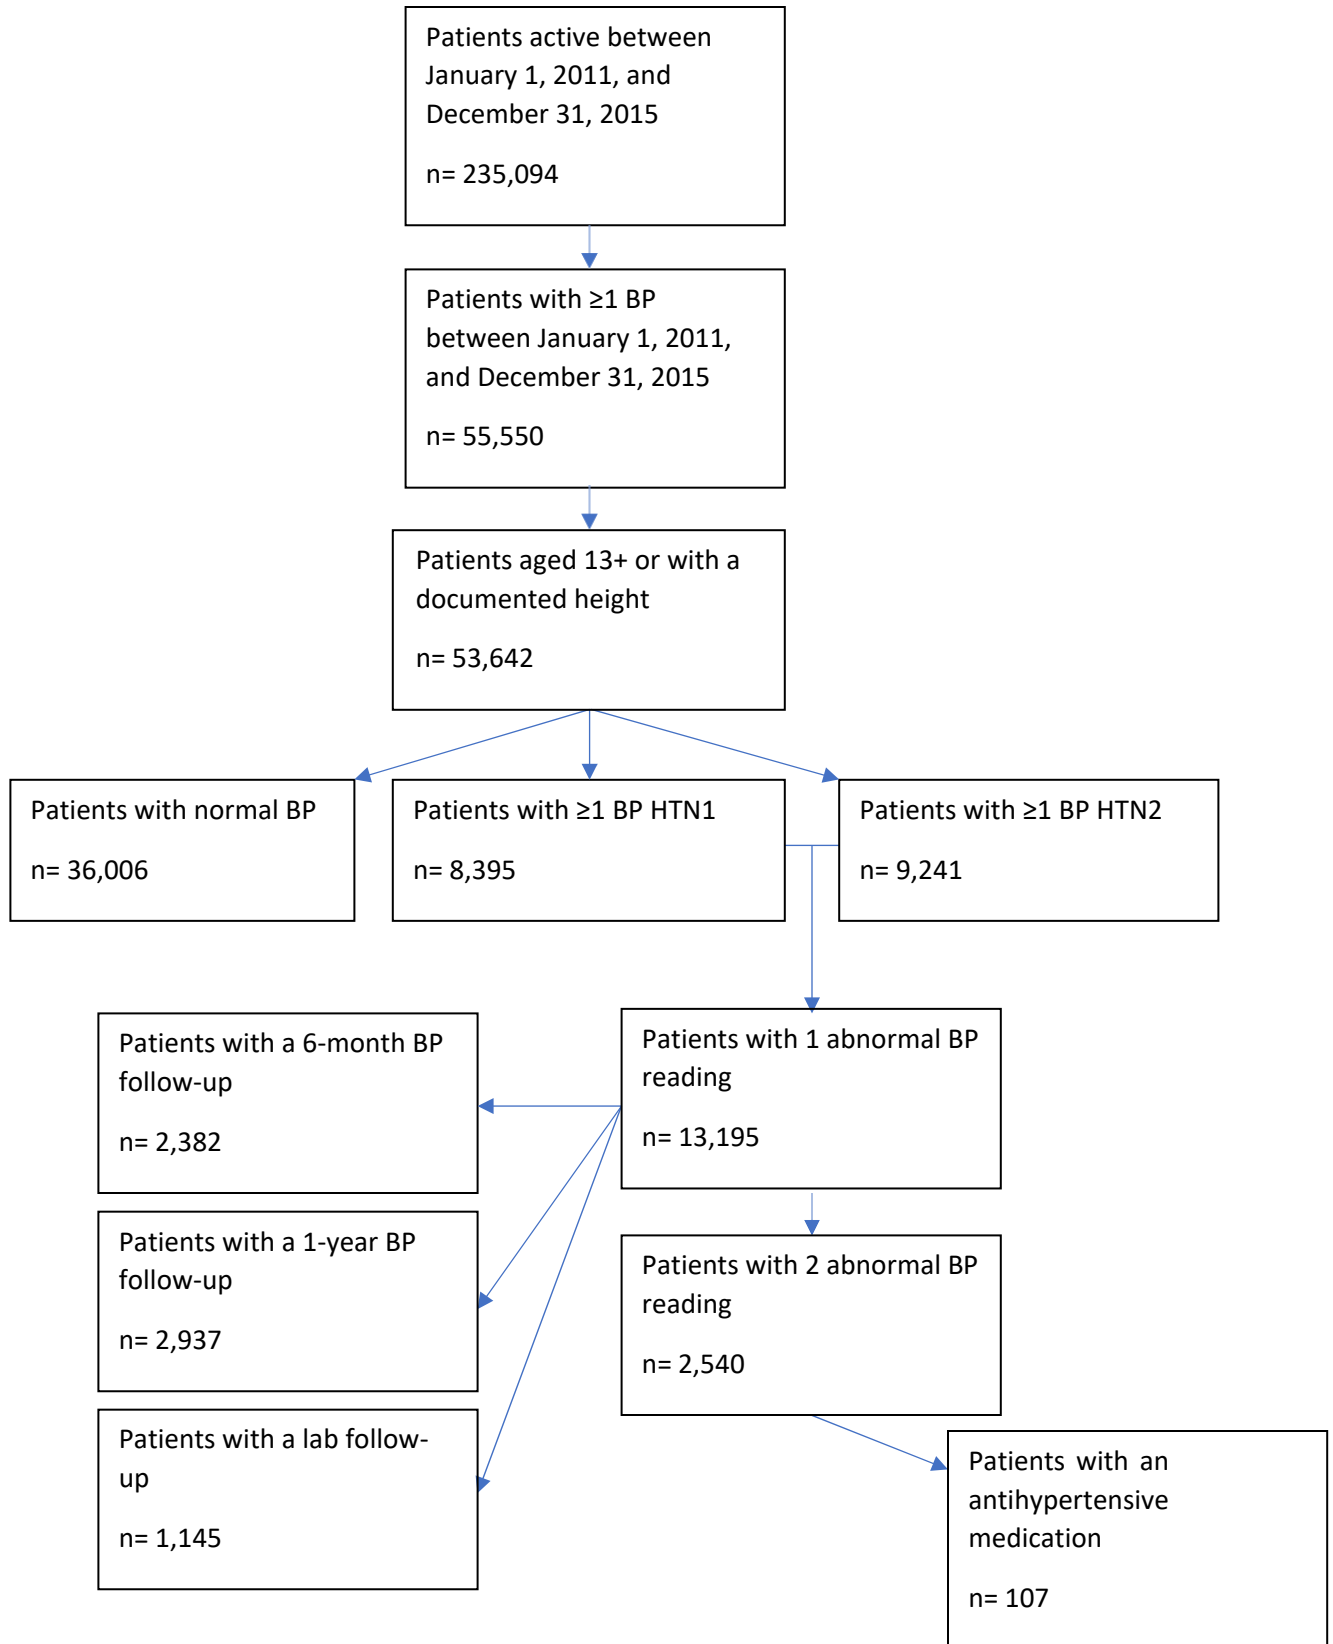

**eFigure 2.** Postguideline Flow diagram.

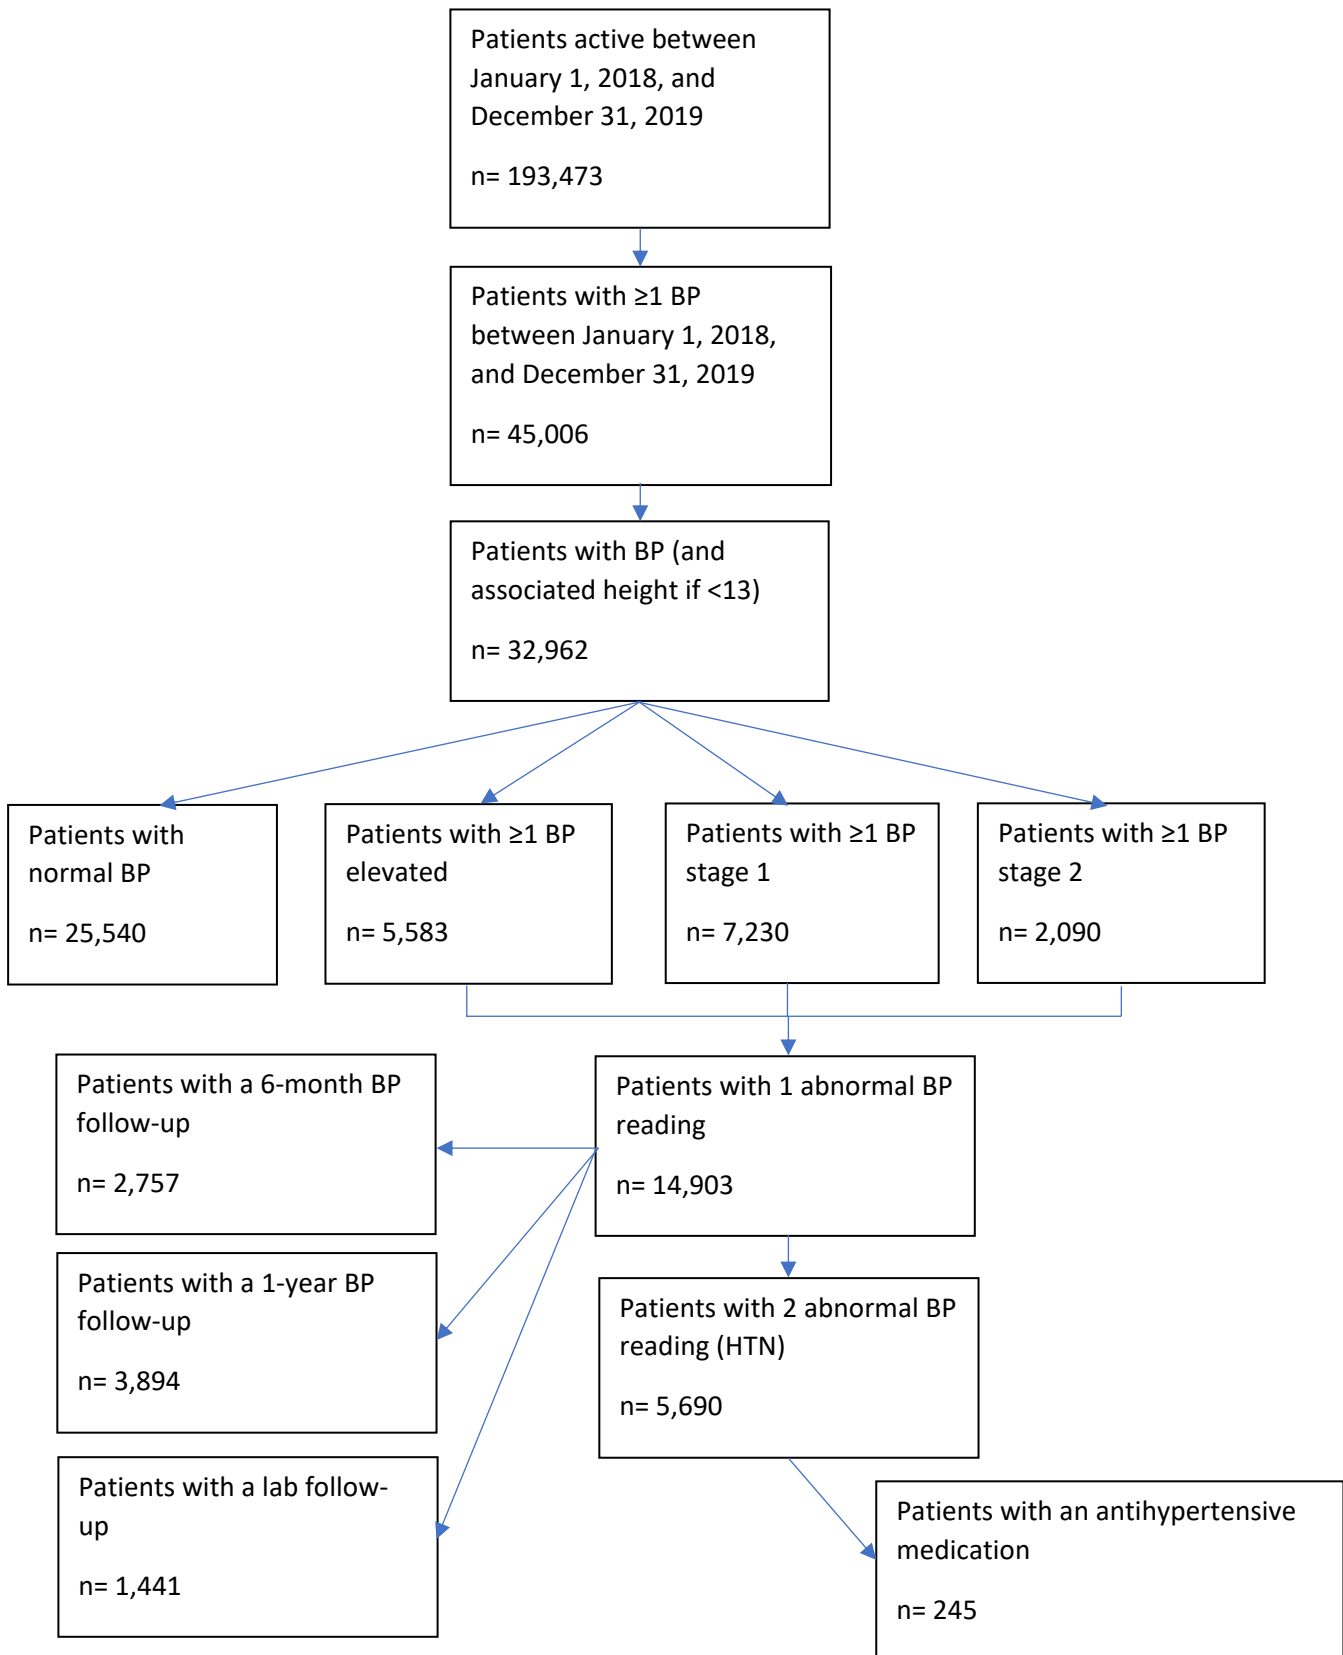

eFigure 3. The Proportion of Children Who Receive an Annual Blood Pressure Screening From January 1, 2011 to December 31, 2019 by a Primary Care Provider

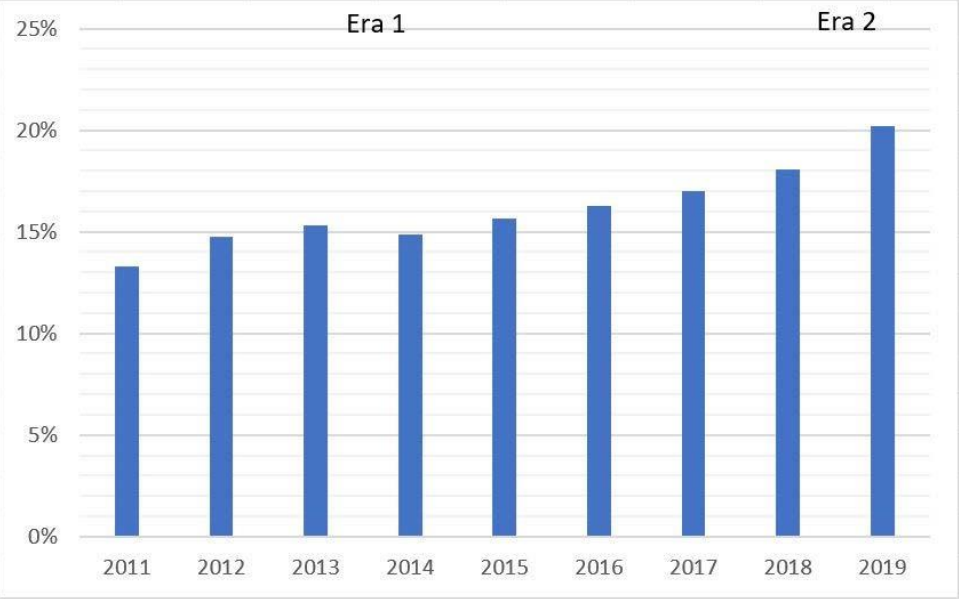

*The percentages are based on children with at least 1 BP each year and as such, some children may have measurements done in more than 1 year.*



**eTable 3. Results of Interrupted Time-Series Analysis to Show the Impact of Hypertension Guidelines on BP Screening, Abnormal BP Follow-Up, HTN Prevalence and Laboratory and Medication Prescriptions, January 1, 2014-December 31, 2019**

|                                             | Beta Coefficient (95% CI) | P-value |
|---------------------------------------------|---------------------------|---------|
| <b>Monthly Blood Pressure Screening</b>     |                           |         |
| Pre-guideline trend <sup>1</sup>            | 0.59 (0.005, 0.013)       | 0.0001  |
| Guideline introduction                      | -0.98 (-0.41, 0.28)       | 0.7     |
| Post-guideline trend <sup>2</sup>           | 0.5 (0.004, 0.28)         | 0.01    |
| <i>DW 2.397, ACF -0.234</i>                 |                           |         |
| <b>6-month blood pressure follow-up</b>     |                           |         |
| Pre-guideline trend <sup>1</sup>            | 0.07 (-0.13, 0.19)        | 0.707   |
| Guideline introduction                      | 1.37 (4.54, 25.23)        | 0.01    |
| Post-guideline trend <sup>2</sup>           | -0.63 (-0.76, -0.22)      | 0.001   |
| <i>DW 0.769, ACF 0.589</i>                  |                           |         |
| <b>1-year blood pressure follow-up</b>      |                           |         |
| Pre-guideline trend <sup>1</sup>            | -0.28 (-0.63, 0.06)       | 0.1     |
| Guideline introduction                      | 1.86 (16.07, 43.35)       | <.0001  |
| Post-guideline trend <sup>2</sup>           | -0.96 (-1.57, -1.21)      | <.0001  |
| <i>DW 0.416, ACF 0.724</i>                  |                           |         |
| <b>Monthly Prevalence of HTN</b>            |                           |         |
| Pre-guideline trend <sup>1</sup>            | 0.58 (0.0003, 0.001)      | 0.0002  |
| Guideline introduction                      | -0.56 (-0.09, -0.004)     | 0.034   |
| Post-guideline trend <sup>2</sup>           | 0.84 (0.003, 0.01)        | <.0001  |
| <i>DW 0.649, ACF 0.648</i>                  |                           |         |
| <b>Laboratory follow-up of Hypertension</b> |                           |         |
| Pre-guideline trend <sup>1</sup>            | 0.44 (0.04, 0.27)         | 0.01    |
| Guideline introduction                      | 0.81 (-6.97, 8.91)        | 0.81    |
| Post-guideline trend <sup>2</sup>           | -0.32 (-0.36, -0.05)      | 0.12    |
| <i>DW 1.452, ACF 0.263</i>                  |                           |         |

---

**Prescribing of medication to pediatric HTN patients**

---

|                                   |                      |        |
|-----------------------------------|----------------------|--------|
| Pre-guideline trend <sup>1</sup>  | 0.71 (0.25, 0.5)     | <.0001 |
| Guideline introduction            | 1.04 (3.74, 26.7)    | 0.01   |
| Post-guideline trend <sup>2</sup> | -0.74 (-0.85, -0.36) | <.0001 |

---

*DW 0.792, ACF 0.592*

---

*DW: Durbin-Watson D*

*ACF: 1<sup>st</sup> Order Autocorrelation*

*1: Pre-guideline period: January 1, 2014-December 31, 2015*

*2: Post-guideline period: January 1, 2018-December 31, 2019*

---

**eTable 4. Results of Stratified Interrupted Time-Series Analysis to Show the Impact of Hypertension Guidelines on BP Screening by Children’s BMI and Age**

|                                                                        |                       |       |
|------------------------------------------------------------------------|-----------------------|-------|
| <i>DW 1.832, ACF 0.044</i>                                             |                       |       |
| <b>Blood Pressure Screening by BMI (BMI = overweight or obese)</b>     |                       |       |
| Pre-guideline trend                                                    | 0.01 (-0.003, 0.03)   | 0.11  |
| Post-guideline level change                                            | -0.25 (-1.57, 1.07)   | 0.7   |
| Post-guideline trend change                                            | -0.01 (-0.05, 0.04)   | 0.8   |
| <i>DW 1.441, ACF 0.244</i>                                             |                       |       |
| <b>Blood Pressure Screening by BMI (BMI = not overweight or obese)</b> |                       |       |
| Pre-guideline trend                                                    | 0.01 (0.001, 0.01)    | 0.02  |
| Post-guideline level change                                            | 0.03 (-0.34, 0.4)     | 0.87  |
| Post-guideline trend change                                            | 0.01 (0.01, 0.02)     | 0.02  |
| <i>DW 2.386, ACF -0.223</i>                                            |                       |       |
| <b>Blood Pressure Screening by age (≤6 years)</b>                      |                       |       |
| Pre-guideline trend                                                    | 0.000 (-0.005, 0.01)  | 0.98  |
| Post-guideline level change                                            | -0.1 (-0.41, 0.21)    | 0.53  |
| Post-guideline trend change                                            | -0.004 (-0.01, 0.004) | 0.33  |
| <i>DW 1.924, ACF -0.021</i>                                            |                       |       |
| <b>Blood Pressure Screening by age (&gt;6 years)</b>                   |                       |       |
| Pre-guideline trend                                                    | -0.002 (-0.01, 0.01)  | 0.6   |
| Post-guideline level change                                            | 0.92 (0.31, 1.54)     | 0.004 |
| Post-guideline trend change                                            | -0.02 (-0.04, 0.003)  | 0.1   |
| <i>DW 1.824, ACF 0.055</i>                                             |                       |       |
| <i>DW: Durbin-Watson D</i>                                             |                       |       |
| <i>ACF: 1<sup>st</sup> Order Autocorrelation</i>                       |                       |       |



eFigure 4. Pediatric Patients With Blood Pressure Screening Documentation in the EMR of Primary Care Providers Participating in CPCSSN Between January 1, 2011, and December 31, 2019, by BMI

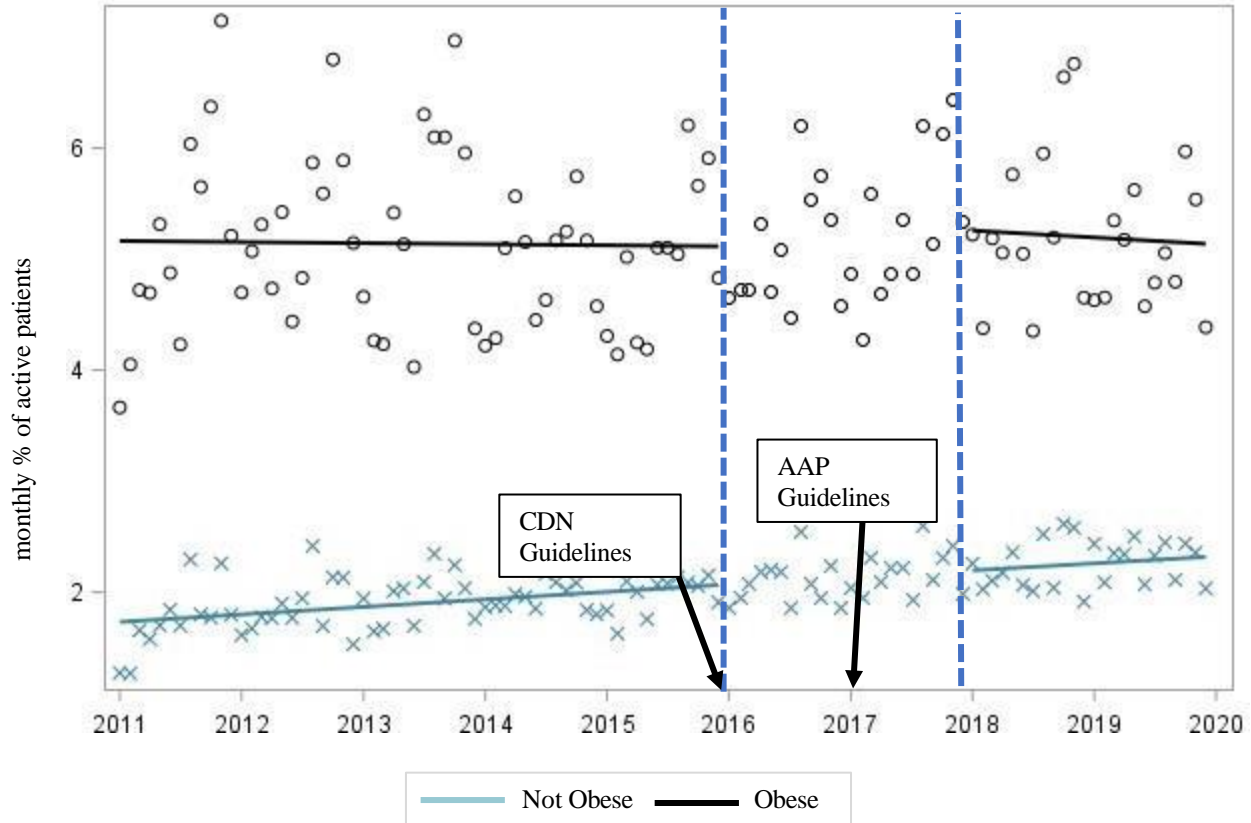

\*CDN Guidelines: Hypertension Canada guidelines

\*AAP Guidelines: American Academy of Pediatrics Guidelines

eFigure 5. Pediatric Patients With Blood Pressure Screening Documentation in the EMR of Primary Care Providers Participating in CPCSSN Between January 1, 2011, and December 31, 2019, by Age

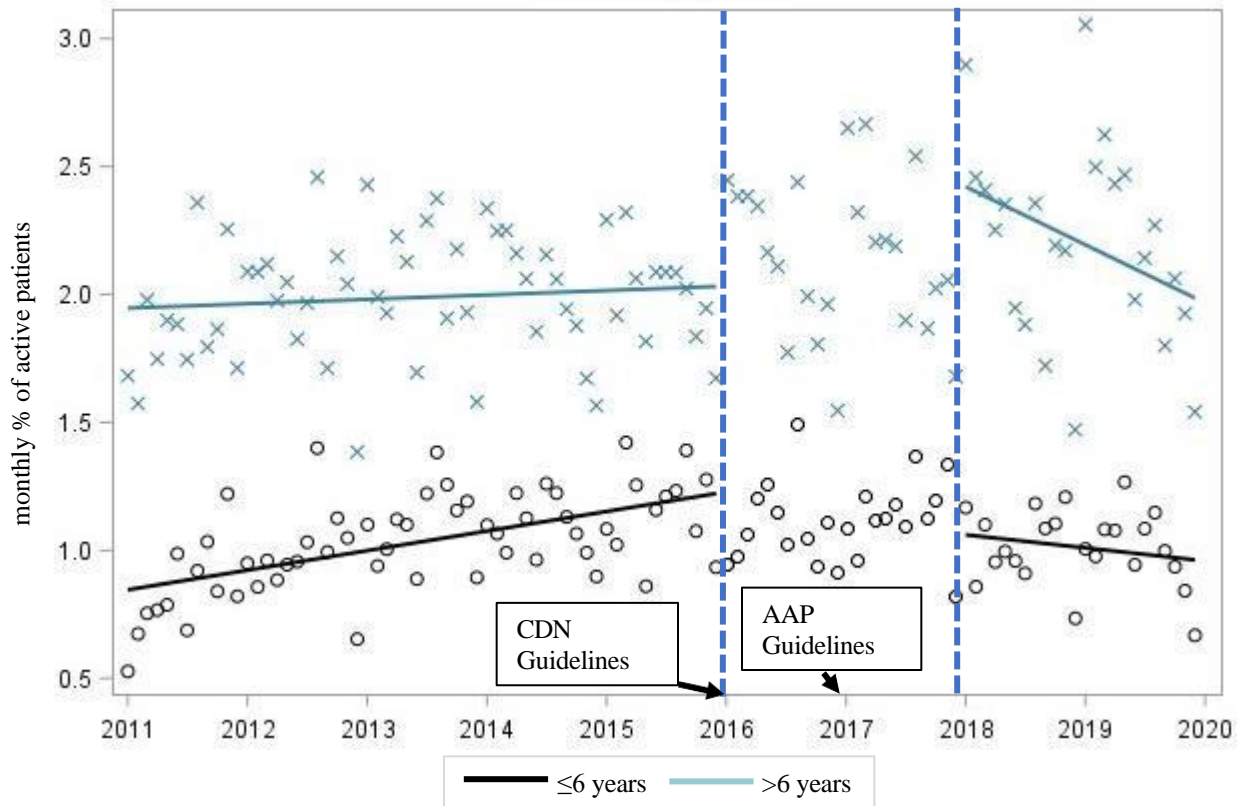

\*CDN Guidelines: Hypertension Canada guidelines

\*AAP Guidelines: American Academy of Pediatrics Guidelines

eFigure 6. Pediatric Patients That Had a BP Documented With A Follow-Up Blood Pressure Screening Documented in the EMR of Primary Care Providers Participating in CPCSSN Between January 1, 2011, and December 31, 2019

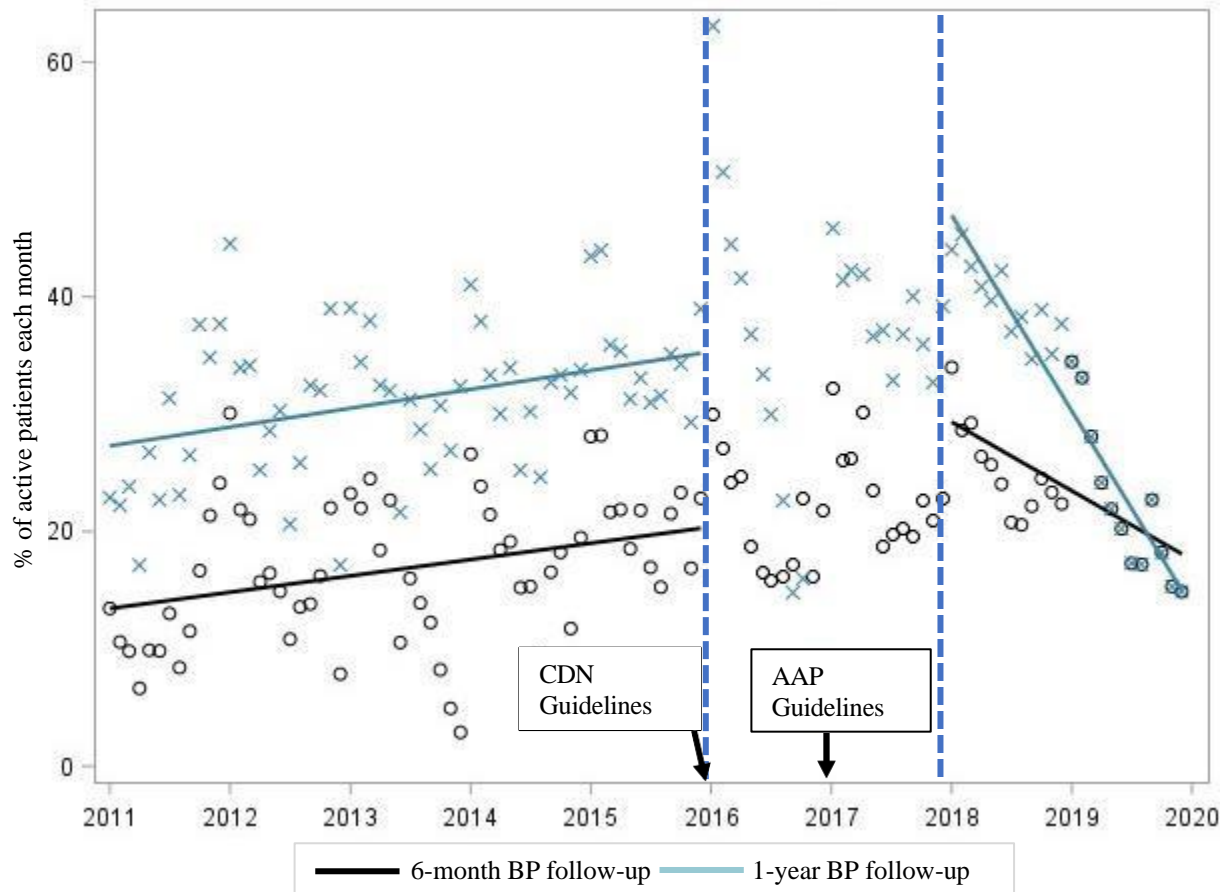

\*CDN Guidelines: Hypertension Canada guidelines

\*AAP Guidelines: American Academy of Pediatrics Guidelines

eFigure 7. The Proportion of Children With a BP Screening Who Met HTN Criteria From January 1, 2011 to December 31, 2019 by a Primary Care Provider

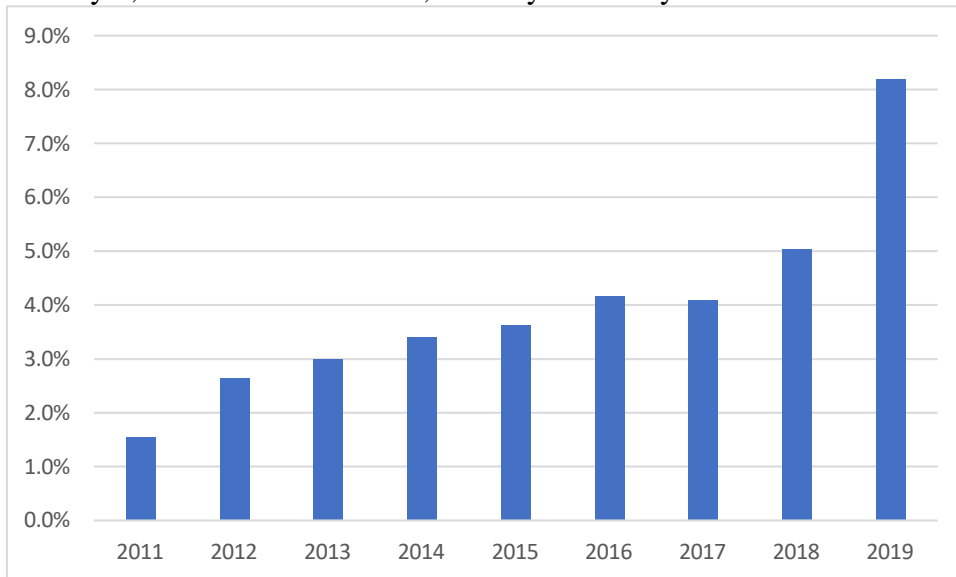

*The NHLBI guideline was used to define thresholds for hypertension (blood pressure >95th percentile) up to December 31, 2017. From January 1, 2018, hypertension was defined by AAP 2017 guidelines as BP  $\geq$ 95th percentile for age, sex and height [3-12 years] or  $\geq$ 130/80mmHg [ $\geq$ 13 years]*



**eTable 5. Results of Stratified Interrupted Time-Series Analysis to Show the Impact of Hypertension Guidelines on HTN Prevalence by Patient BMI and Age**

| <b>HTN by BMI (BMI = overweight or obese)</b>     |                       |       |
|---------------------------------------------------|-----------------------|-------|
| Pre-guideline trend                               | 0.01 (0.01, 0.02)     | <.001 |
| Post-guideline level change                       | -0.04 (-0.32, 0.24)   | 0.79  |
| Post-guideline trend change                       | 0.03 (0.01, 0.05)     | 0.003 |
| <i>DW 1.616, ACF 0.186</i>                        |                       |       |
| <b>HTN by BMI (BMI = not overweight or obese)</b> |                       |       |
| Pre-guideline trend                               | 0.02 (0.02, 0.03)     | <.001 |
| Post-guideline level change                       | 0.06 (-0.58, 0.7)     | 0.85  |
| Post-guideline trend change                       | 0.128 (0.09, 0.16)    | <.001 |
| <i>DW 0.742, ACF 0.597</i>                        |                       |       |
| <b>HTN by age (≤6 years)</b>                      |                       |       |
| Pre-guideline trend                               | 0.001 (0.0004, 0.002) | 0.001 |
| Post-guideline level change                       | -1.97 (-3.64, -0.3)   | 0.02  |
| Post-guideline trend change                       | 0.17 (0.12, 0.22)     | <.001 |
| <i>DW 1.565, ACF 0.696</i>                        |                       |       |
| <b>HTN by age (&gt;6 years)</b>                   |                       |       |
| Pre-guideline trend                               | 0.02 (0.01, 0.02)     | <.001 |
| Post-guideline level change                       | 1.06 (0.3, 1.83)      | 0.01  |
| Post-guideline trend change                       | 0.17 (0.12, 0.22)     | <.001 |
| <i>DW 0.459, ACF 0.759</i>                        |                       |       |
| <i>DW: Durbin-Watson D</i>                        |                       |       |
| <i>ACF: 1<sup>st</sup> Order Autocorrelation</i>  |                       |       |

eFigure 8. Pediatric Patients That Had a BP Screen With  $\geq 2$  Elevated Blood Pressures Documented in the EMR of Primary Care Providers Participating in CPCSSN Between January 1, 2011, and December 31, 2019, by BMI

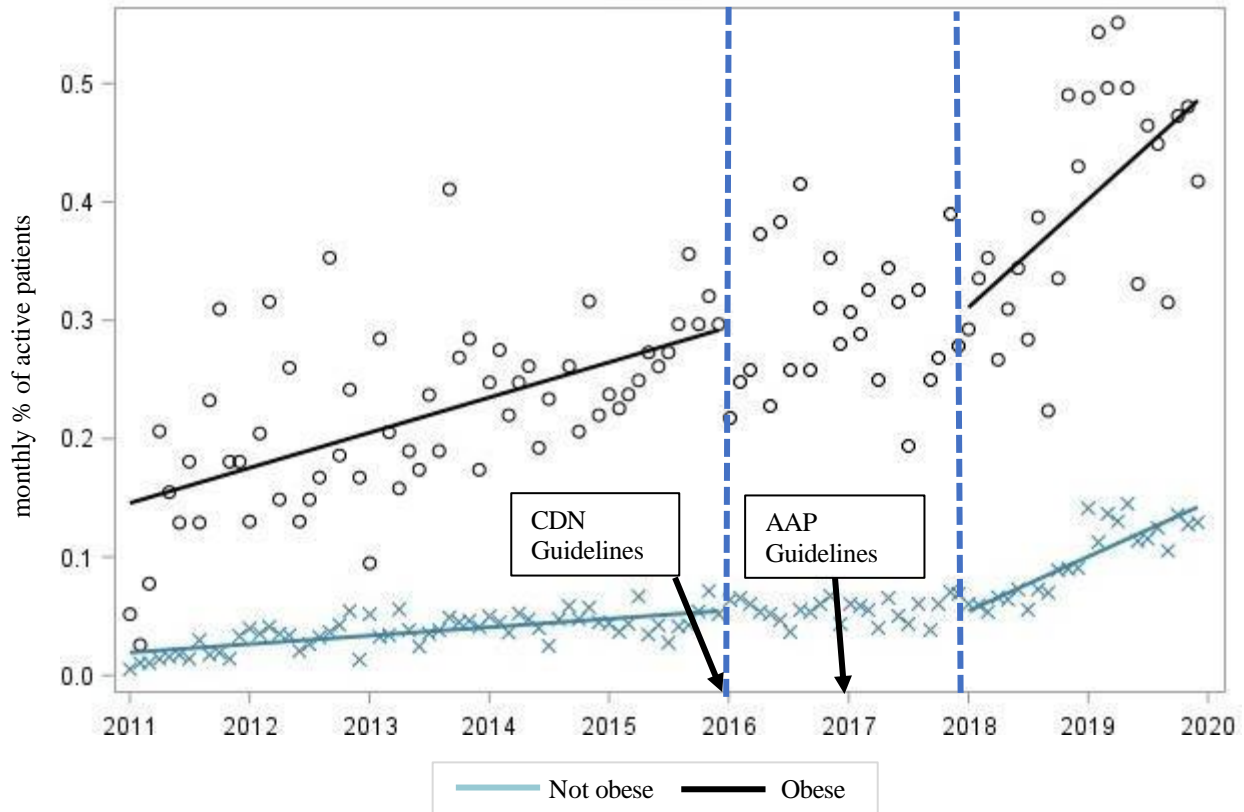

\*CDN Guidelines: Hypertension Canada guidelines

\*AAP Guidelines: American Academy of Pediatrics Guidelines

eFigure 9. Pediatric Patients With  $\geq 2$  Elevated Blood Pressures Documented in the EMR of Primary Care Providers Participating in CPCSSN Between January 1, 2011, and December 31, 2019, by Age

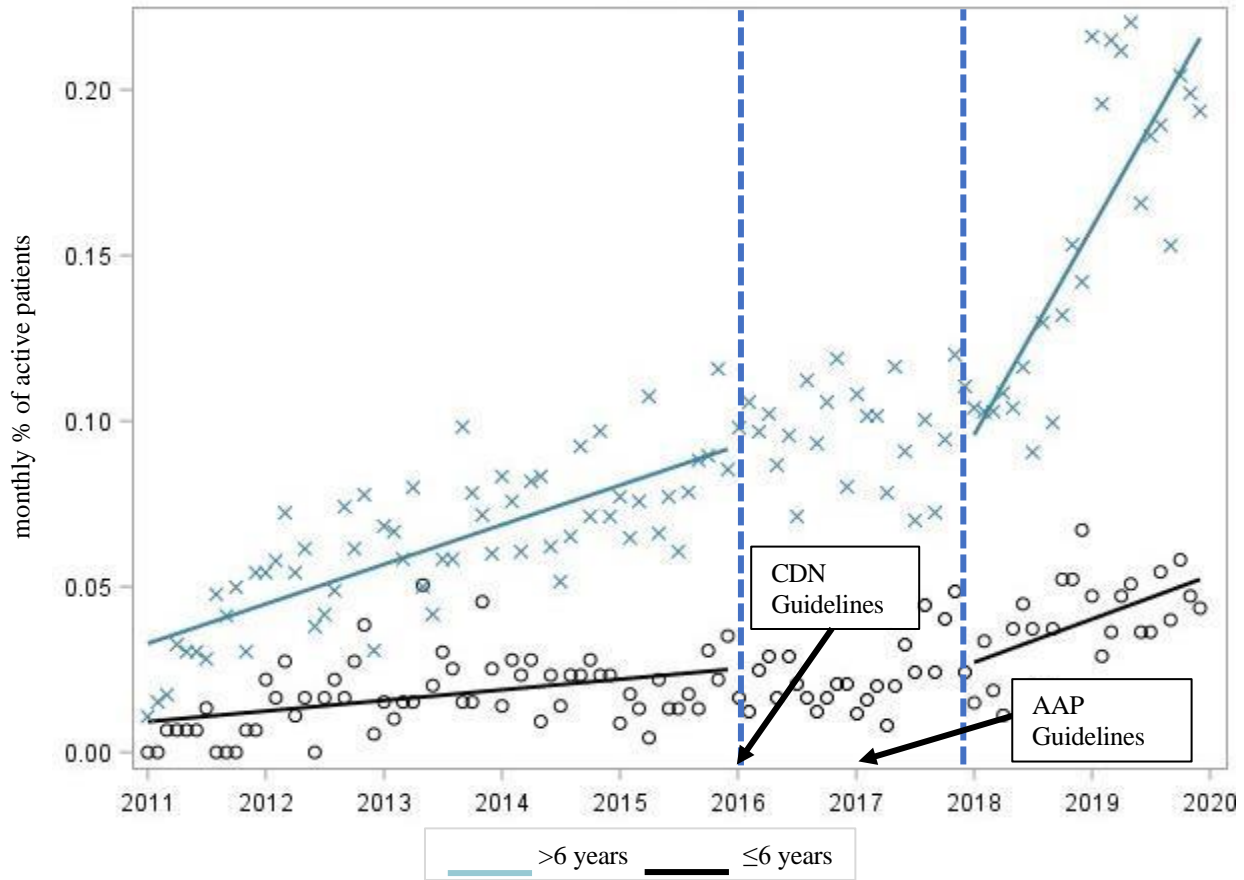

\*CDN Guidelines: Hypertension Canada guidelines

\*AAP Guidelines: American Academy of Pediatrics Guidelines

eFigure 10. The Proportion of Children Who Underwent Laboratory Testing or Had a Medication Follow-Up From January 1, 2011 to December 31, 2019 by a Primary Care Provider

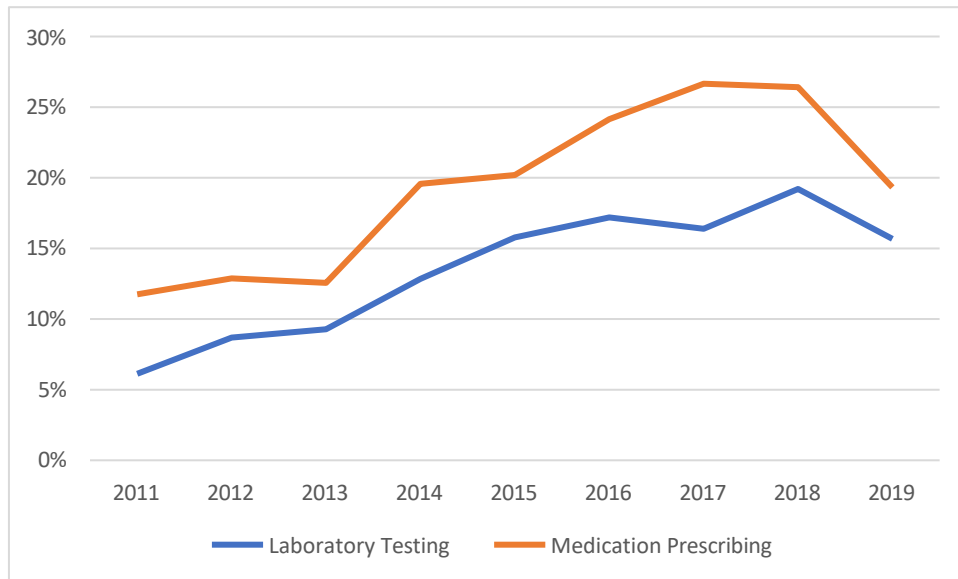

Supplement: jamanetwopen-e2355239-s001.pdf [file jamanetwopen-e2355239-s001.pdf]
