# Supplementary material for: Temporal Trends in Practice Patterns After Introduction of Pediatric Hypertension Guidelines in Canada
Source: PubMed Central journal article supplement (PMC10853834; doi:10.1001/jamanetworkopen.2023.55239), 2024-02-08
Supplement: jamanetwopen-e2355239-s002.pdf [file jamanetwopen-e2355239-s002.pdf]

## Data Sharing Statement

Wu. Temporal Trends in Practice Patterns After Introduction of Pediatric Hypertension Guidelines in Canada. *JAMA Netw Open*. Published February 08, 2024.  
doi:10.1001/jamanetworkopen.2023.55239

### Data

**Data available:** No
